# Supplementary material for: Comparative Evaluation of Two Venous Sampling Techniques for the Assessment of Pancreatic Insulin and Zinc Release upon Glucose Challenge
Source: J Diabetes Res. 2015 Jul 27;2015:789359. doi: 10.1155/2015/789359 (PMC4530279; doi:10.1155/2015/789359)
Supplement: Supplementary file 1 — Video File 1 Transhepatic portal venous access, ultrasound guided long axis method: The probe and the needle are placed side by side. The portal vein (dark echo void rounded structure) is almost 15 cm deep (the distance markers are on the left side of the screen, long markers every 5 cm and short markers every 1 cm from the skin). The needle is seen traversing the liver parenchyma towards the portal vein on the right side of the screen as an echogenic moving spot. Note, the beam follows a sector pattern and the needle is kept within the beam. During respiratory moments the needle will move in and out of plane. The operator adjusts the needle by minor cranio-caudal and medio-lateral deflections to keep the needle in plane while advancing the tip towards the portal vein. Contrast injection confirms portal vein access. Video File 2 Transplenic splenic vein access: First needle is passed into the splenic parenchyma. Contrast injected through this needle to opacify the splenic parenchyma with reflux into the splenic vein. Targeting the opacified splenic vein, a second needle is advanced in this plane. The needle is observed on real time fluoroscopy as it passed into the target. The needle tip is then confirmed to be within the targeted splenic vein in all projections by rotating the C arm while observing it's relation to the opacified splenic vein on live fluoroscopy. If the tip is too deep or too shallow, appropriate needle adjustments are performed. Contrast injection confirms splenic vein access. [file 789359.f1.zip]

Archive with 2 entries (2 files):
- Video File 1.mp4
- Video File 2.mp4
